# Supplementary material
Source: PubMed Central journal article supplement (PMC9890382)

**inside corner** test part

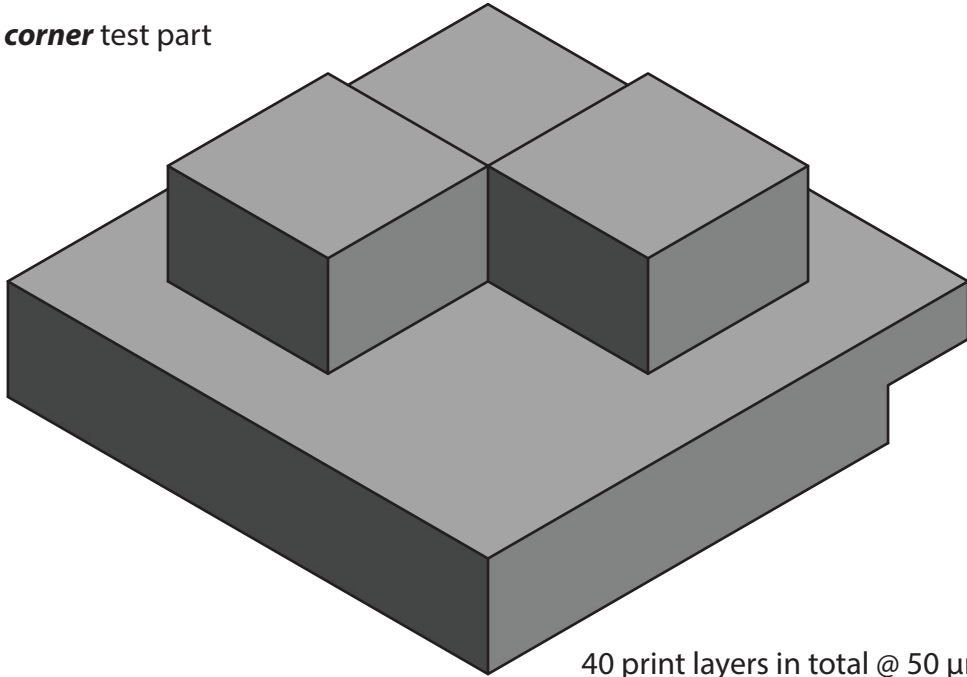

40 print layers in total @ 50  $\mu\text{m}$  per layer  
2 mm total design height  
all measurements are in mm

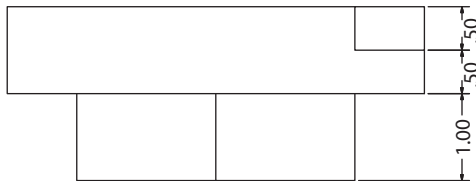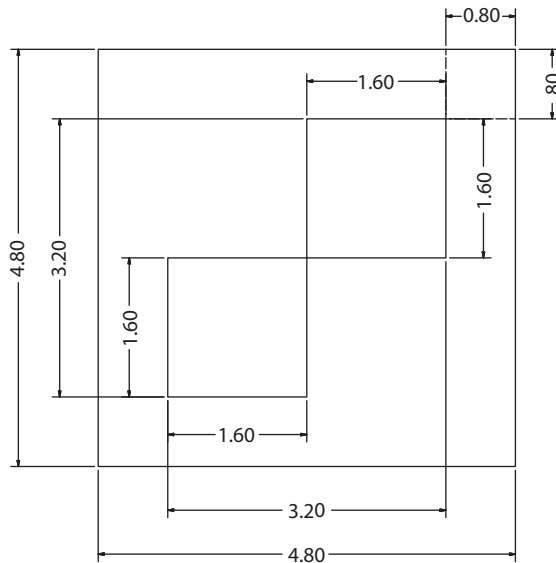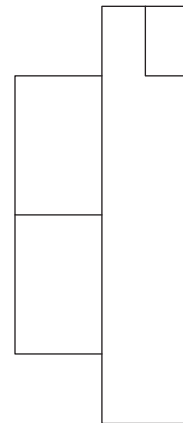

sample illumination conditions for the final layers of the test parts inspected with laser scanning confocal microscopy

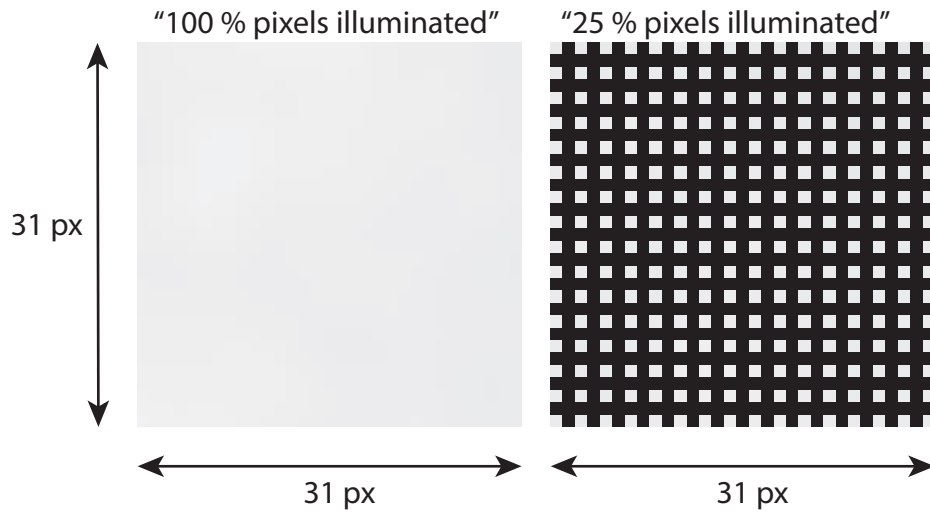

Supplement: NIHMS1862474-supplement-Supp1.pdf [file NIHMS1862474-supplement-Supp1.pdf]
